# Supplementary figures and images for: EWS/FLI1 Regulates EYA3 in Ewing Sarcoma via Modulation of miRNA-708, Resulting in Increased Cell Survival and Chemoresistance
Source: Oxford University Press journal article supplement (doi:10.1158/1541-7786.mcr-12-0086), 2012-06-22

**a**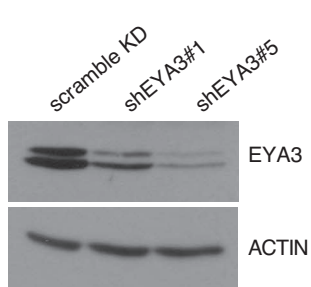**b**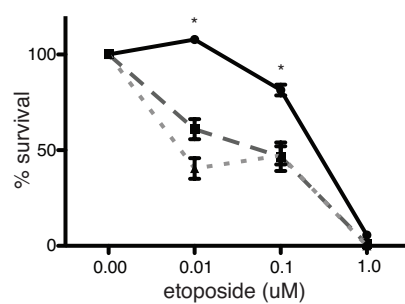

**Supplementary Figure 6. EYA3 inhibition sensitizes SKES-1 Ewing's sarcoma cells to etoposide.**

Supplement: 15417786mcr120086-sup-f6_311k.pdf [file 15417786mcr120086-sup-f6_311k.pdf]
